# Supplementary material for: Connecting climate services with plant health communities to enable climate-smart pest management
Source: Research Square preprint supplement (doi:10.21203/rs.3.rs-8194908/v1), 2026-02-17
Supplement: Supplementary file 1 [file ee91850bb8b085ba84b1c03c.docx]

SUPPLEMENTARY INFORMATION

**Table S1:** Workshop session output: how weather and climate impact the occurrence and/or severity of pests and diseases on crop production in Kenya

| **Crop** | **Insect pest** | **Disease** | **Weather/climate factor(s) which influence the pest/disease** |
| --- | --- | --- | --- |
| Maize | Fall armyworm (FAW)  African armyworm (AAW)  Stalk borer  Striga  Aphids  Chafer grubs  Weevils | Maize lethal necrosis disease (MLND)  Head smut | **FAW:** Population increases when temperatures are high, incidence increases with low humidity/less rain.  **AAW:** Dry season followed by onset of rain triggers emergence, especially when there are tender leaves and windy weather (operates like desert locust). Low temperature precipitates the severity. Heavy rain usually reduces the population.  **Stalk borer:** Thrives during dry spells and when temperatures rise.  **Striga:** Thrives in warm soil temperatures, rainfall increases growth rate.  **Aphids:** Populations increase when temperatures are high.  **Chafer grubs:** Not affected by weather.  **MLND:** Spread by insect vectors: when temperature increases, vector populations increase; correlated with the wind and relative humidity; crop stress (drought) triggers vulnerability to attacks. High levels when the weather is dry.  **Head smut:** Wind spreads the spores; also spread by contaminated seed and soil. |
| Potatoes | Potato Cyst Nematode (PCN)  Potato tuber moth  Millipede  Whitefly | Late and early blight, bacterial wilt  Potato virus Y (PVY) and other potato viruses  Soft rot | **PCN:** Soil-borne, largely insensitive, though increases following high rainfall.  **Millipede**: Not affected by weather.  **Potato tuber moth:** Population increases in dry, warmer weather.  **Whitefly:** Populations thrive with increased temperature.  **Blights and bacterial wilt:** Triggered by high humidity/rainfall and low temperature.  **PVY:** Aphids are the main vector, common during the drought, increasing temperature increases population growth. Wind may influence the movement of aphids. High temperature is associated with high incidences of virus. |
| Beans | Bean fly  Bean aphid  Whitefly  Bollworm  Bean bruchid  Leaf miners | Bean leaf rust  Halo blight  Bacterial leaf spot  Bean common mosaic virus (BCMV)  Anthracnose | **All pest populations**: Increase when temperatures are high and rains are low.  **Bean fly**: Populations are low when it rains.  **Bean rust, leaf spot, BCMV:** Increase when temperatures are high.  **Anthracnose:** Thrives in high humidity and low temperature. |
| Tomatoes | False codling moth (FCM)  Red spider mite  Tomato leafminer  Whitefly  African bollworm  Thrips  Root node nematode | Late Blight  Blight  Bacterial wilt  Fusarium wilt  Tomato spotted wilt virus and other viruses  Blossom end rot | **Tomato leafminer**: Not affected by temperature**.**  **FCM:** Prevalent in warmer areas; also feeds on green maize: it switches to fruits after the crop has been harvested; wind also influences the distribution of the pest. Additionally, dry soil facilitates the metamorphosis of the pest, they die if the soil is wet/moist.  **Whitefly:** More pronounced during the dry season and when temperatures are high.  **Red spider mites, aphids, thrips:** population increases when temperatures are high.  **Root knot nematodes**: not affected by weather.  **Blights, bacterial wilt:** High rainfall increases incidences of diseases.  **Fusarium wilt:** The higher the temperature and moisture, the higher the incidence.  **Tomato spotted wilt virus:** Incidence increases with an increase in temperature.  **Blossom end rot**: Affected by the availability of water; increases when there is no rain. |
| All | Desert locust | - | **Desert locust**: Spread is aided by high temperatures and wind. |
| Avocado | False codling moth (FCM)  Fruit fly  Gall midge | Root rot  Scab  Anthracnose  Avocado sunblotch viroid | **FCM:** Spread is attributed to hot weather and drought.  **Fruit fly:** Increases during dry weather, worsened by prolonged dry conditions and higher temperatures. |
| Mango | Fruit fly  Mango weevil | Anthracnose  Powdery mildew | **Fruit fly:** Increases during dry weather, worsened by prolonged dry conditions and higher temperatures. |
| Coffee | Thrips | Coffee berry disease (CBD)  Fusarium wilt  Berry borers | **CBD:** Incidences increase with low temperatures. |
| Banana | Banana weevil  Thrips | - | - |
| Roses | False codling moth (FCM)  Whitefly | Botrytis  Mildews (powdery and downy) | **Botrytis/downy mildews**: Thrive in relative humidity and cool temperatures.  **Powdery mildews**: Thrive in dry weather and high temperatures. |

**Table S2:** Workshop session output: Mapping weather and climate services and digital information and tools for crop pest and disease management in Kenya

| **Crop** | **Insect pest** | **Service, tools, information for management** | **Extent of use** | **Contains weather information?** | **Any other information (e.g. diagnostics, disease management, etc.)** |
| --- | --- | --- | --- | --- | --- |
| Generic | Generic | Seasonal forecast for national and county levels: led by counties at the beginning of the season together with Ministry of Agriculture, KMD, traditional forecasters | Not known | Yes | Predict pests and diseases likely to occur during the season |
| Multiple | Multiple | Kenya Meteorological Department (KMD):  - Agro-met bulletins: accessible from the KMD website, and circulated via a mailing list  - Decadal forecast  - Early warning and climate information | Early warning is widely used (others not known) | Yes | Useful in crop management |
| Multiple | Multiple, (e.g. FAW, bean fly, angular leafspot, tomato leaf miner, tomato early blight, whitefly, maize stem borer, spotted stalk borer, cotton ball worm) | PRISE - Pest Risk Information Service (CABI) | Not known | Yes | Agro-advisory based on projected risks. Forecasting models used to forecast disease outbreaks in certain geographical areas |
| Multiple (e.g. maize, potato, sorghum, green grams) | Multiple | Kenya Agri Observatory Platform (KAOP) | Widely used, 20,000+ downloads on Google Play Store; 400,000 unique users | Yes (weather forecast/agronomic analytics, has area specificity). | Does not include information/advice on management based on the weather analytics |
| Multiple | Multiple | KALRO good agricultural practices (GAPs) app |  | Yes | Water management, disease management, climate-smart/ resilience advisory |
| Multiple | - | KALRO CROP SELECTOR | Widely used | Helps to select which crops are suitable for a particular agroecological zone | Crops that can be grown, and different varieties |
| Multiple | Multiple | Plantix | Not widely used/average | No | Diagnostics and early warning systems |
| Multiple | Multiple | PlantwisePlus Factsheets app | Widely used (mainly by Plant Doctors) | No | Disease management, diagnosis |
| Multiple | Multiple | Sprout (<https://sproutopencontent.com/about>): an open content agriculture database and platform | - | - | - |
| Multiple | Transboundary migratory pests e.g. Desert locust, FAW, AAW | Desert Locust Control Organization (DLCO) | Not known | - | Early warning for desert locusts to inform government interventions |
| Multiple | Desert locust | eLocust3m | Widely used | Yes, especially wind information. | None |
| Multiple | Desert locust | Laikipia good agricultural practices (GAPS) | County-specific | Not known |  |
| Multiple | FAW, AAW | MoA INFO - by Precision Development (PxD) SMS platform | Widely used | - | - |
| Multiple | FAW, AAW | Yara farm weather | Average | Yes | Good agricultural practices (GAPs) |
| Multiple | FAW, AAW | Nakuru plant health early warning and rapid response team | County-specific/Average | Yes | - |
| Multiple | FAW | FAW Monitoring and Early Warning System (FAMEWS) | Not known | No | - |
| Multiple/Maize | FAW, AAW | Community-based armyworm monitoring forecasting and early warning (CBAWMFAEW) | Average | Yes | - |
| Multiple/Maize | FAW, AAW | Nakuru farmers call center website | County-specific though reaches other farmers | Yes | - |
| Multiple/Maize | FAW, AAW | KOBO Collect | Widely used | Average | Allows users to upload images of the pest for reporting |
| Multiple/Maize | FAW, AAW | Participatory scenario planning (PSP) | Average | Yes |  |
| Multiple/Maize | FAW, AAW | Extension service, farmer field schools, extension methodologies | Widely used | Yes | - |
| Multiple | - | Shamba Shape-Up: a program on a leading national broadcaster, Citizen TV. Widely viewed, has aired for 10+ years.  Ranet (FM radio): Early warning systems vernacular radio broadcasts e.g. in Muranga, Bundalangi. | - | - | - |
| Potatoes | - | NPCK Viazi Soko platform | Widely used | Yes | Extension services for potato, pest and disease advisory, booking for potato seed, market information |
| - | - | Infonet Biovision | Widely used | No | Agroecological zones, agronomic practices of various pests, management, diagnosis |
